# Supplementary material
Source: Springer Nature journal article supplement (https://www.springermedizin.de/resource/supplementary/12884_2012_682_MOESM1_ESM.pdf/9457900)
Supplement: MOESM1 [file 9457900]

Pre-existing diabetes mellitus (type 1 or 2) and GA < 16 weeks  
**OR**  
 Gestational diabetes and GA < 30 weeks

**AND**

- Insulin treatment
- Age  $\geq$  18 years
- Singleton pregnancy
- No severe medical or psychological comorbidity

**Randomisation**

**CGMS +**

**CGMS**

**Obstetrics**

Standard Care

**Diabetology**

|                      |                       |
|----------------------|-----------------------|
| Intake               | HbA1c                 |
| GA12, 18, 24, 30, 36 | Diary, HbA1c and CGMS |

**Diabetology**

|                      |              |
|----------------------|--------------|
| Intake               | HbA1c        |
| GA12, 18, 24, 30, 36 | Diary, HbA1c |
